# Supplementary material for: Continuous lateral oscillations as a core mechanism for taxis in Drosophila larvae
Source: eLife journal article supplement (doi:10.7554/elife.15504), 2016-10-18
Supplement: supp [file elife-15504-supp-v1.zip]

Archive with 3 entries (3 files):
- elife_poa_e15504_Figure_1_figure_supplement_1.pdf
- elife_poa_e15504_Figure_2_figure_supplement_1.pdf
- elife_poa_e15504_Figure_3_figure_supplement_1.pdf
