# Supplementary material for: Continuous lateral oscillations as a core mechanism for taxis in Drosophila larvae
Source: eLife journal article supplement (doi:10.7554/elife.15504), 2016-10-18

Dual regulation: Up-regulate turns (towards 180 degree), Down-regulate turns (towards 0 degree)

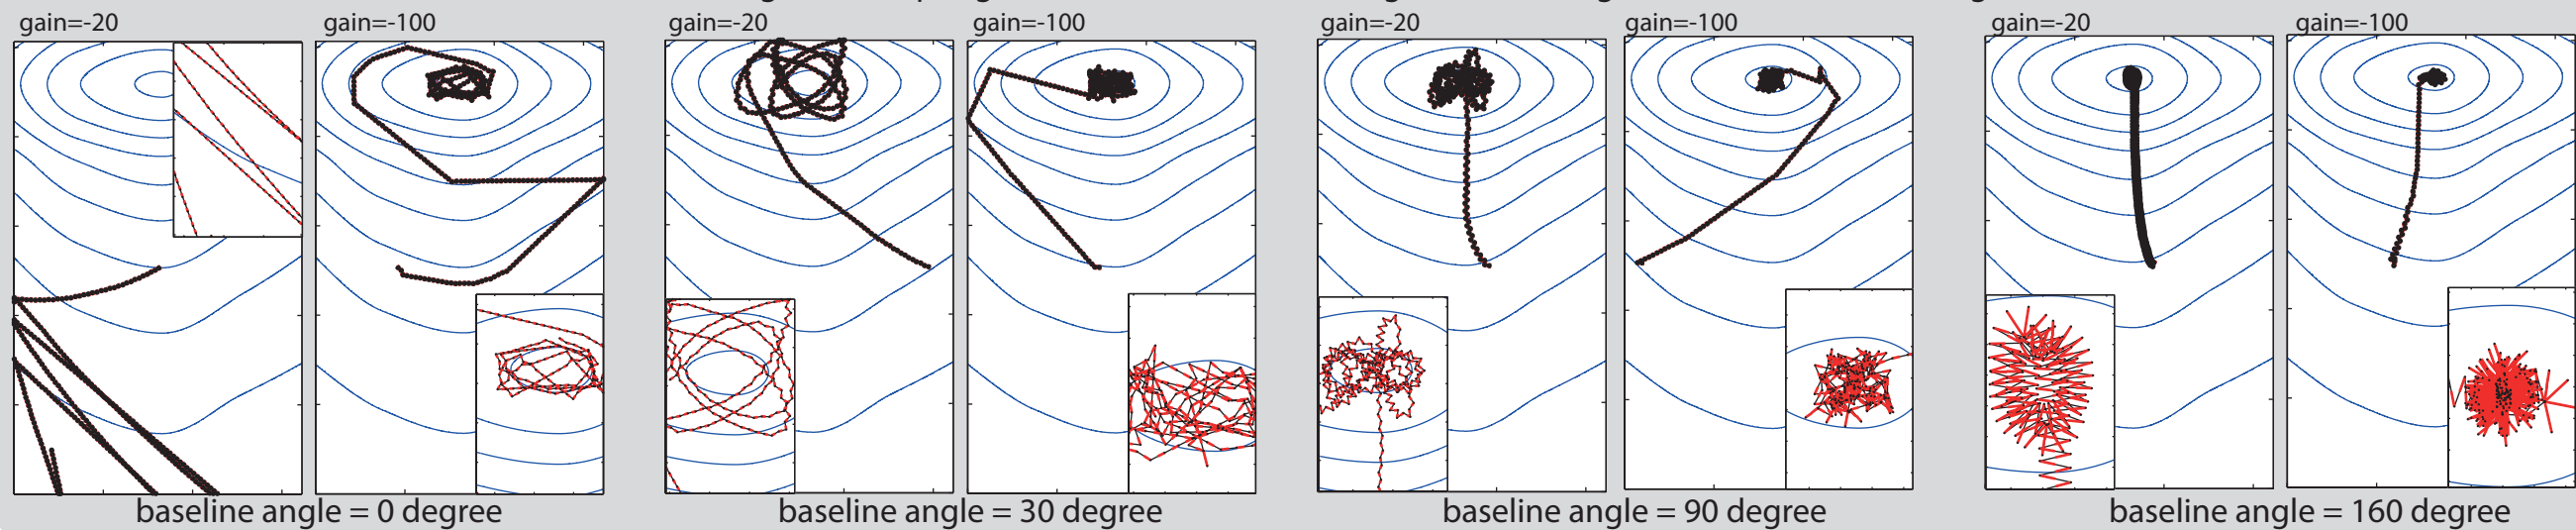

Up-regulate turns only (towards 180 degree)

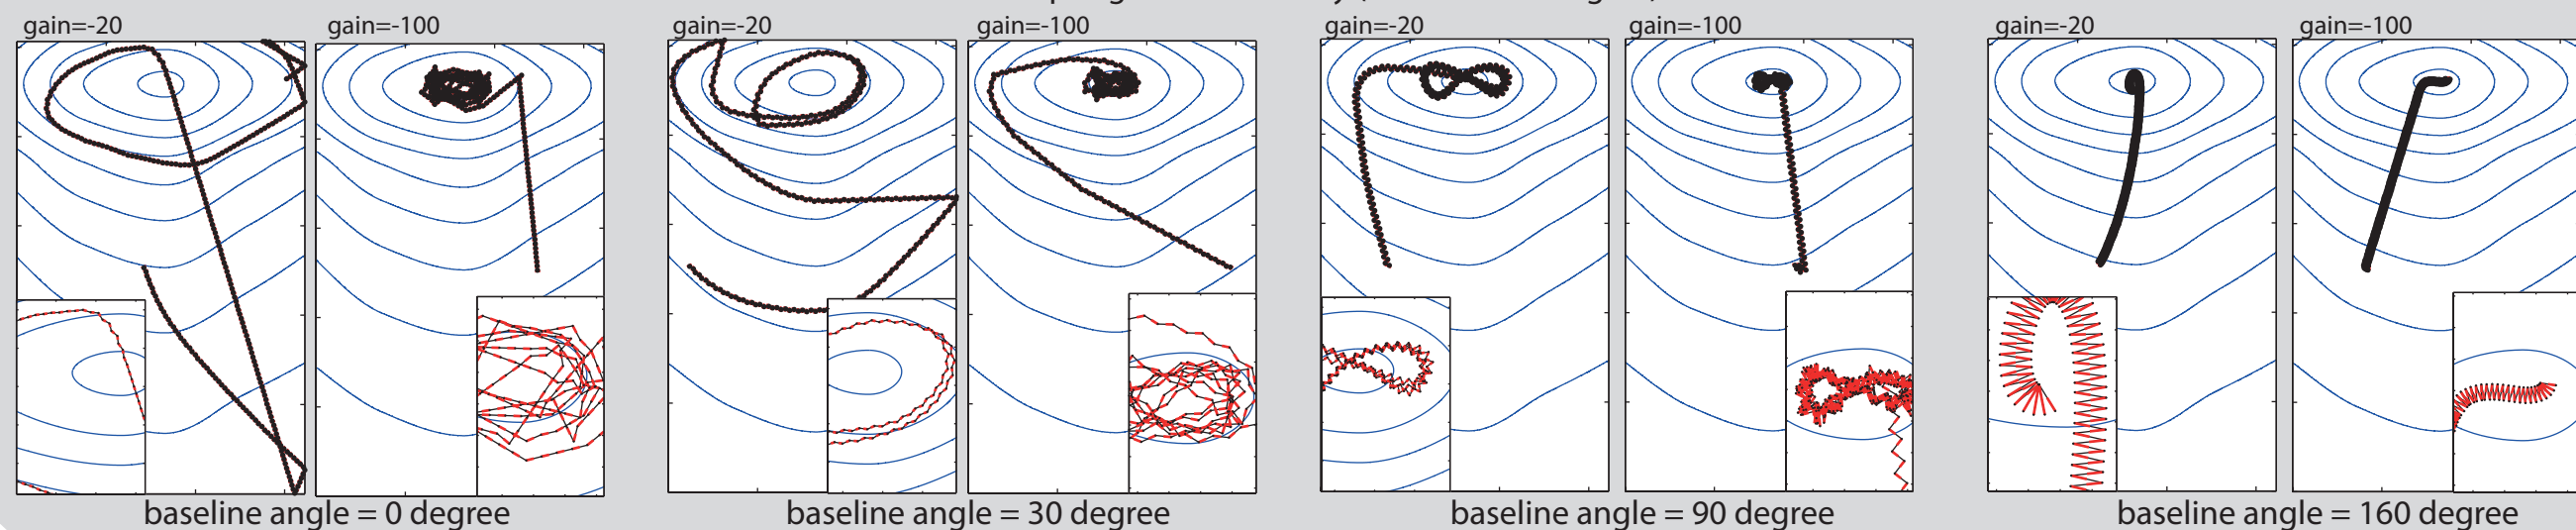

Down-regulate turns only (towards 0 degree)

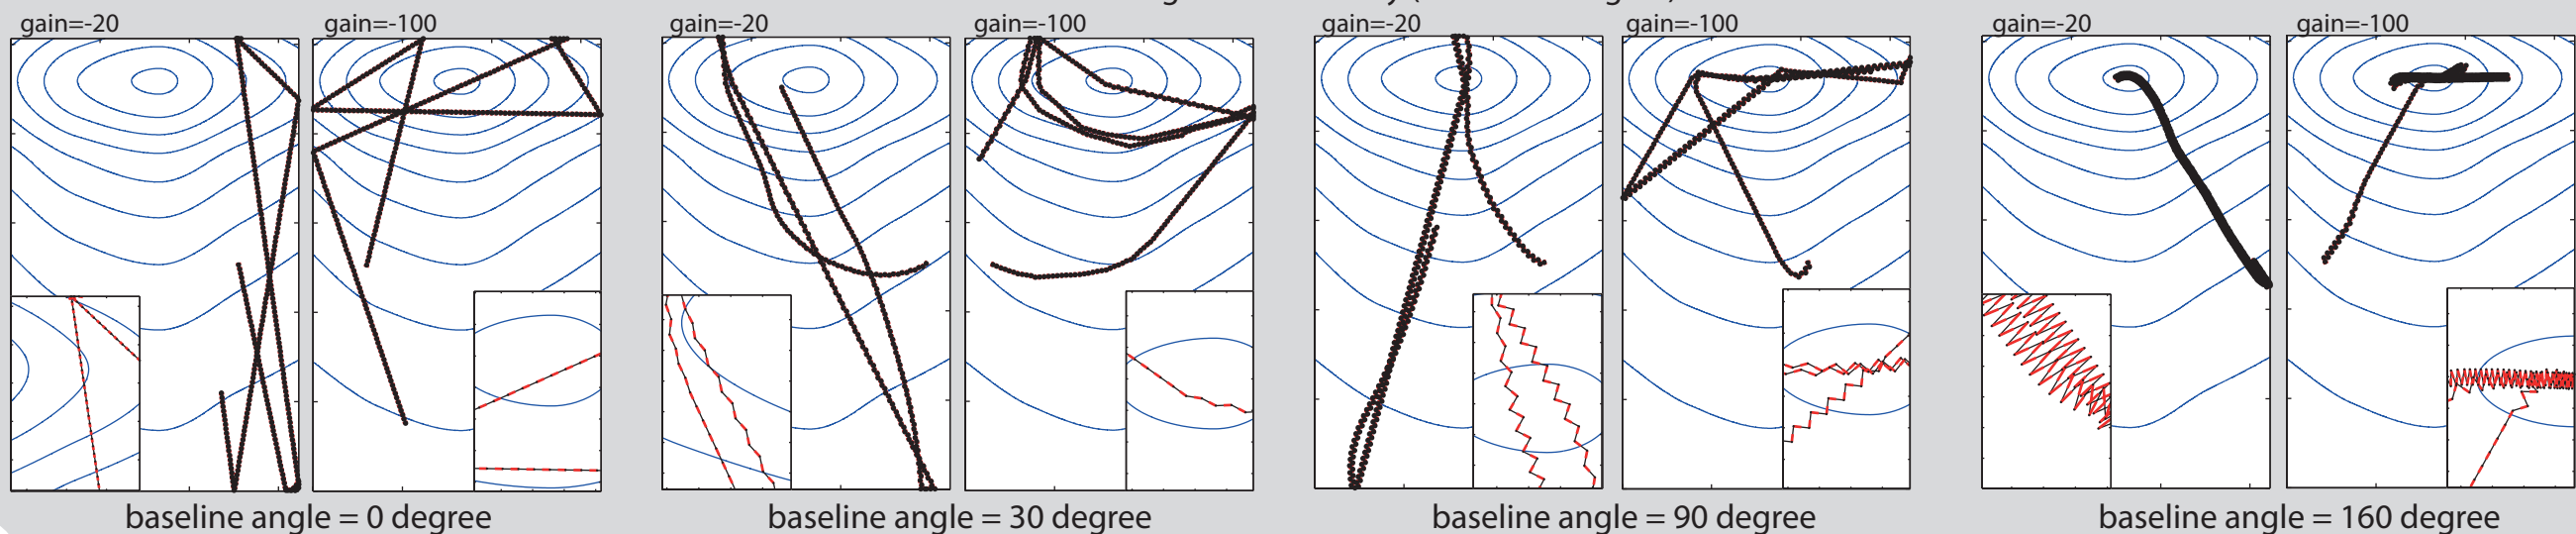

Supplement: supp [file elife-15504-supp-v1.zip]
