# Supplementary material for: Continuous lateral oscillations as a core mechanism for taxis in Drosophila larvae
Source: eLife journal article supplement (doi:10.7554/elife.15504), 2016-10-18

**Anterior body angular velocity**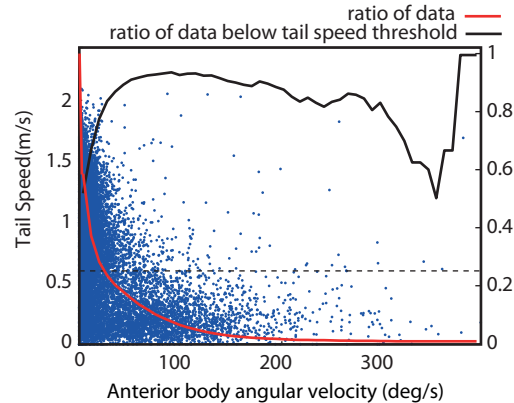**Body bending**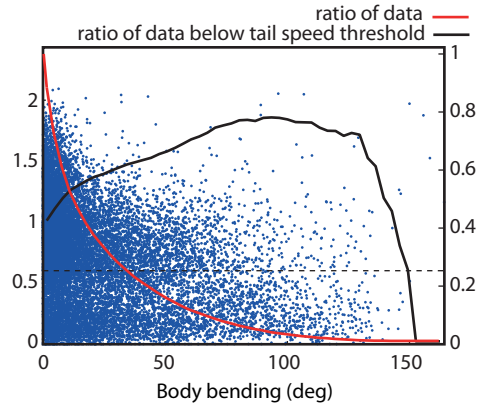**Extent of anterior body turns**  
(from one side to the other)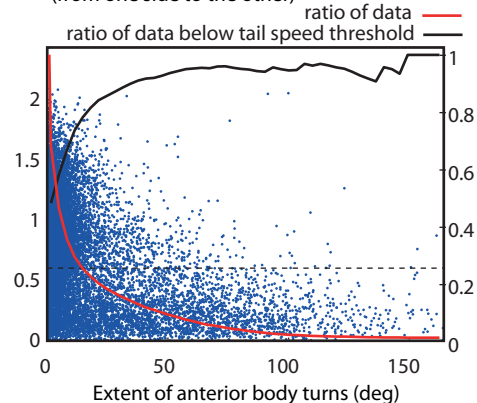**Anterior body angular acceleration**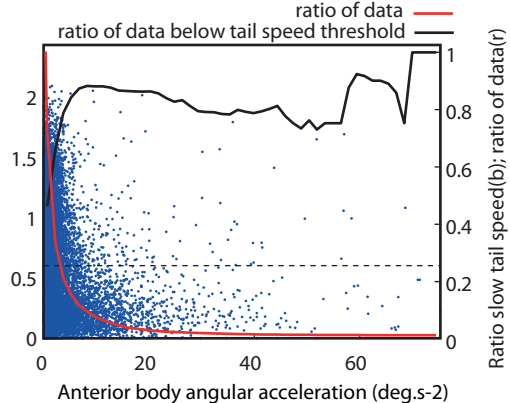

Supplement: supp [file elife-15504-supp-v1.zip]
