# Supplementary figures and images for: Continuous lateral oscillations as a core mechanism for taxis in Drosophila larvae
Source: eLife journal article supplement (doi:10.7554/elife.15504), 2016-10-18

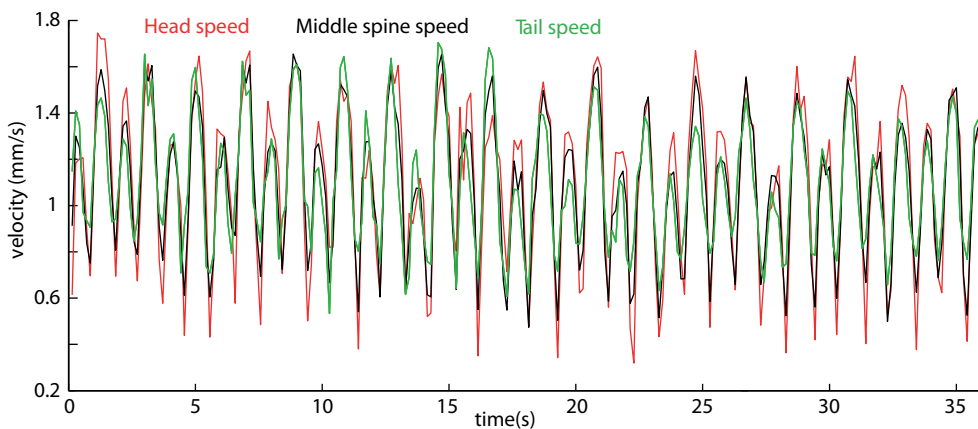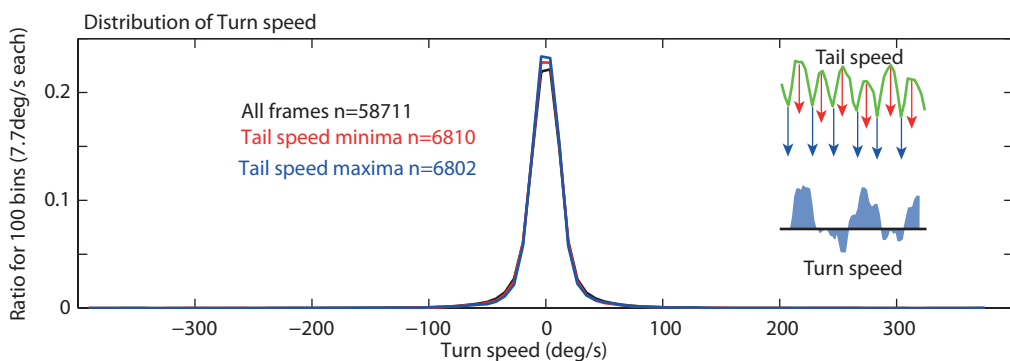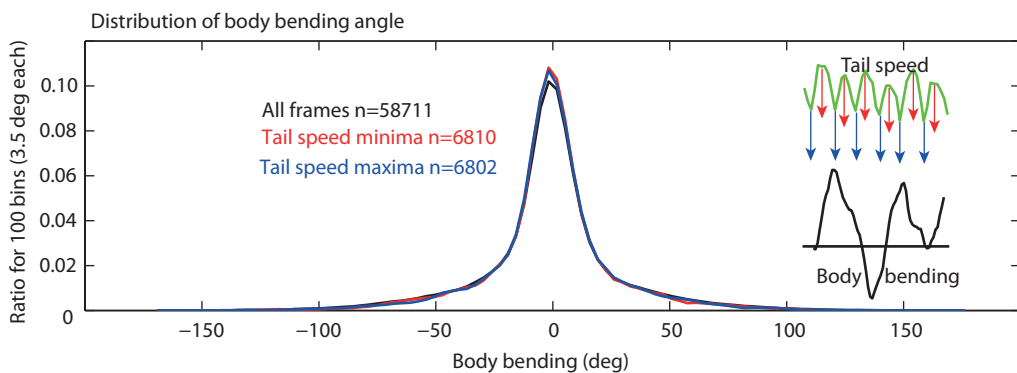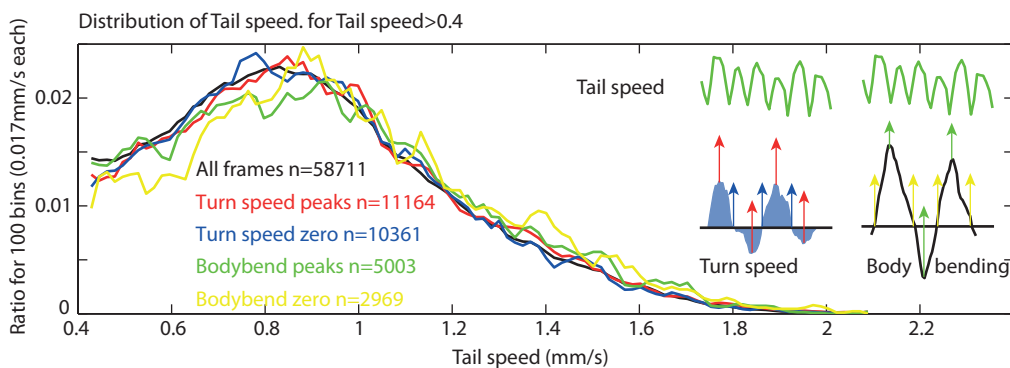

Supplement: supp [file elife-15504-supp-v1.zip]
